# Supplementary material for: OxyS small RNA induces cell cycle arrest to allow DNA damage repair
Source: PubMed Central journal article supplement (PMC5793797; doi:10.15252/embj.201797651), 2017-12-13
Supplement: EMBJ-37-413-s001.pdf [file EMBJ-37-413-s001.pdf]

Appendix  
for

**OxyS small RNA induces cell cycle arrest to allow DNA damage repair**

Shir Barshishat, Maya Elgrably-Weiss, Jonathan Edelstein, Jens Georg,  
Sutharsan Govindarajan, Meytal Haviv, Patrick R. Wright, Wolfgang R. Hess, Shoshy Altuvia

**Table of contents**

**Appendix figures**

Appendix figure S1-S12

**Appendix tables**

Appendix table S1

Appendix table S2

Appendix table S3

**Appendix references**

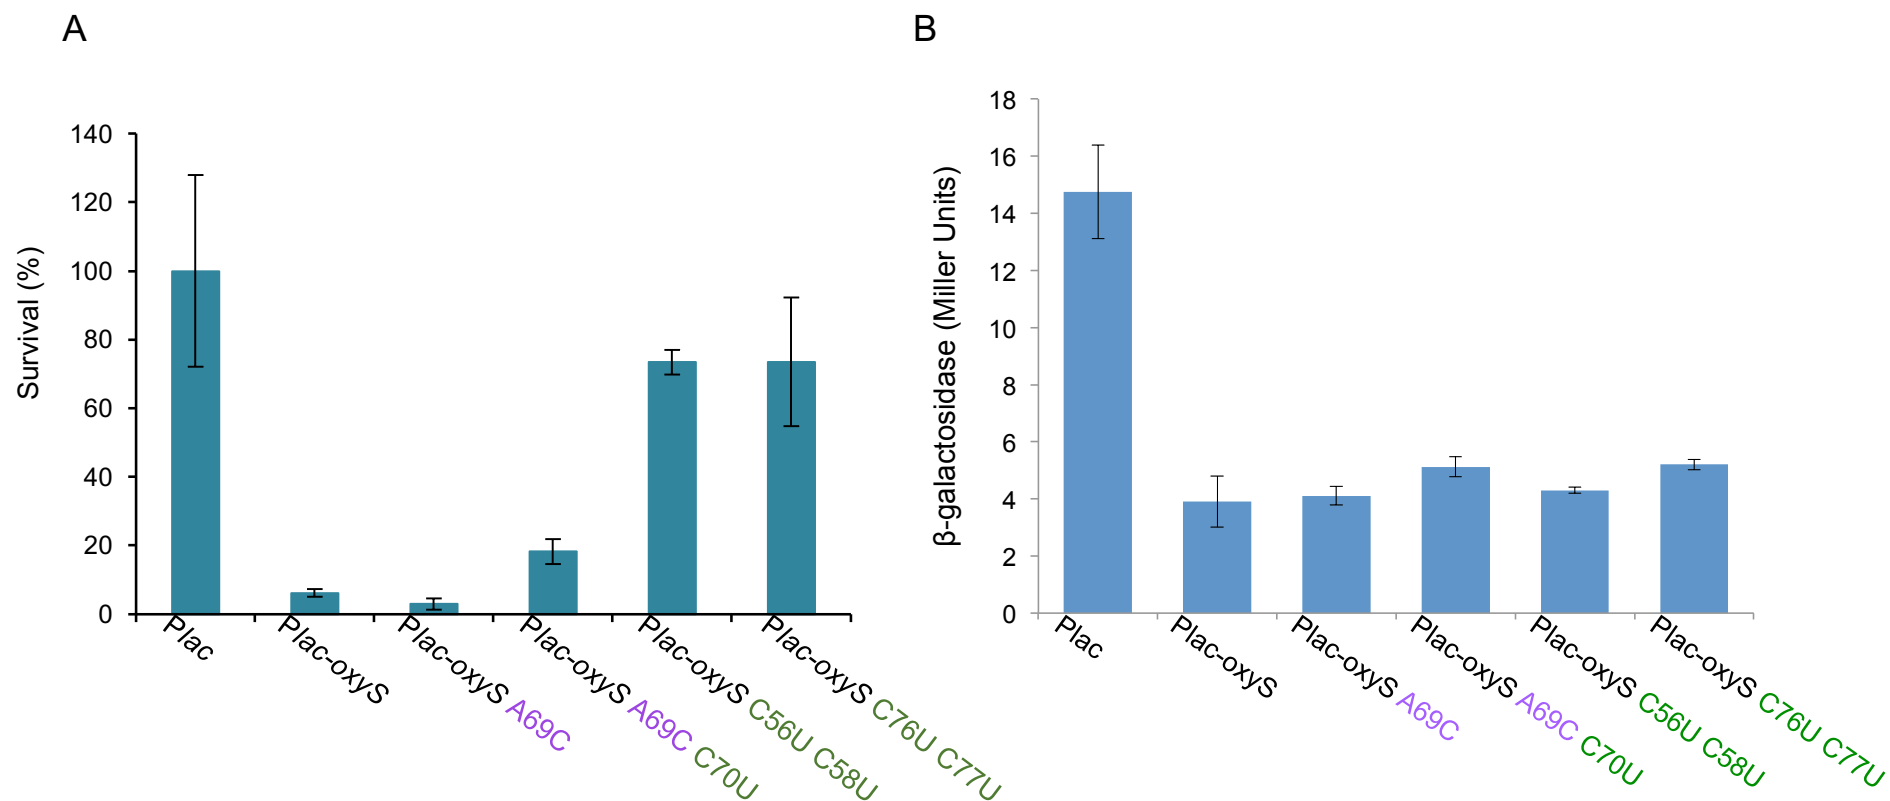

**Appendix Figure S1.** Characterization of OxyS toxic and nontoxic mutants. **(A)** Expression of OxyS is detrimental. Cultures (MG1655 *relA::cat*, *lacI<sup>q</sup>*) carrying plasmids were treated with 0.4mM IPTG at OD600 of 0.1. Samples were taken prior to and 60 minutes after the addition of IPTG. Survival of cells carrying *Plac* plasmid was used as 100% reference. **(B)** *fhlA-lacZ* repression by OxyS toxic and nontoxic mutants. Cells carrying  $\lambda$ *fhlA-lacZ* translation fusion and OxyS plasmids were treated with 1mM IPTG for 1 hour at OD600 of 1. (MG1655  $\lambda$ *fhlA-lacZ*: *kan*, *relA::cat*, *lacI<sup>q</sup>*, *lacZ::Tn10*). Results are displayed as mean of 2 biological experiments  $\pm$  standard deviation.

A

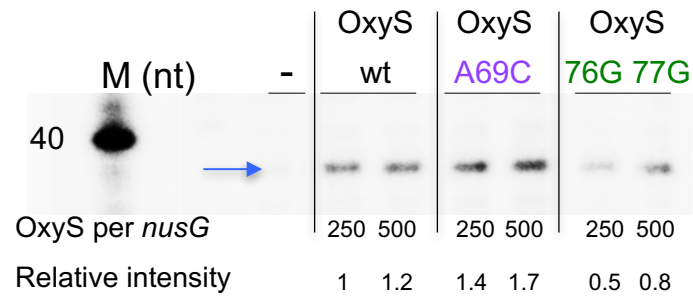

**Appendix Figure S2A.** RNase protection assay. OxyS RNAs, wild type and mutants were mixed with fully labeled *nusG* mRNA at the indicated ratios. After heating, the mixture was cooled and the RNAs were allowed to anneal at 45°C. The mixture was then treated with single stranded specific ribonucleases (RNase A and T1) to cleave unpaired nucleotides. The radioactive digestion products were separated using 8% urea-polyacrylamide sequencing gel. As basepairing between OxyS and *nusG* is discontinuous, annealing of *nusG* to OxyS mutant RNAs was estimated based on the formation of the full-length hybrid. OxyS-*nusG* full-length hybrid spans at least 35 nucleotides. Relative intensity denotes the ratio of the full-length hybrids obtained, compared to wild type *oxyS-nusG* interaction, which was used as a 100% reference. All lanes are from the same blot/exposure from which irrelevant interspersed lanes were removed.

B

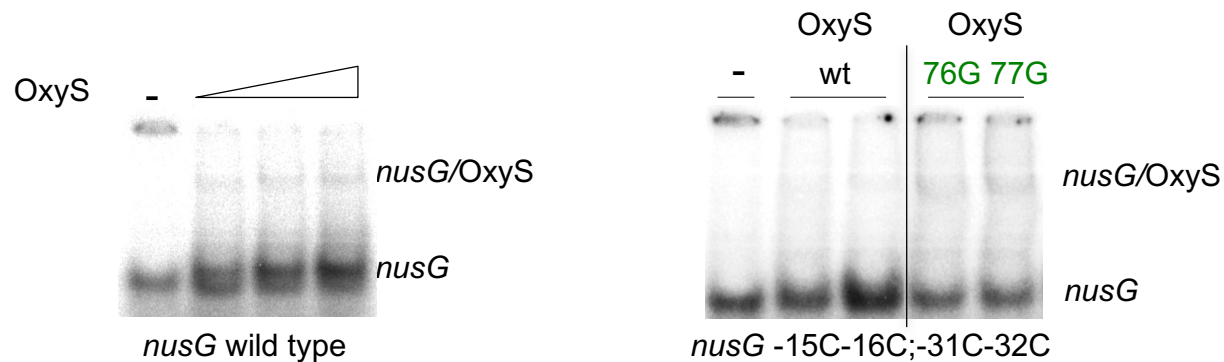

**Appendix Figure S2B.** EMSA. 0.01 pmol (left panel) and 0.004 pmol (right panel) of fully labeled wild type and quadruple mutant *nusG* mRNA (176 nt), respectively, without and with OxyS (left panel; 5, 10, 15 pmol and right panel 2, 4 pmol) were incubated in DEPC treated water at 85°C for 15 min. Thereafter, the mixtures were incubated at 37°C (left panel) or 42°C (right panel) for 60 min in binding buffer as described in Materials and Methods. The RNAs were separated using 4.5 % polyacrylamide native gel. All lanes are from the same blot/exposure from which irrelevant interspersed lanes were removed.

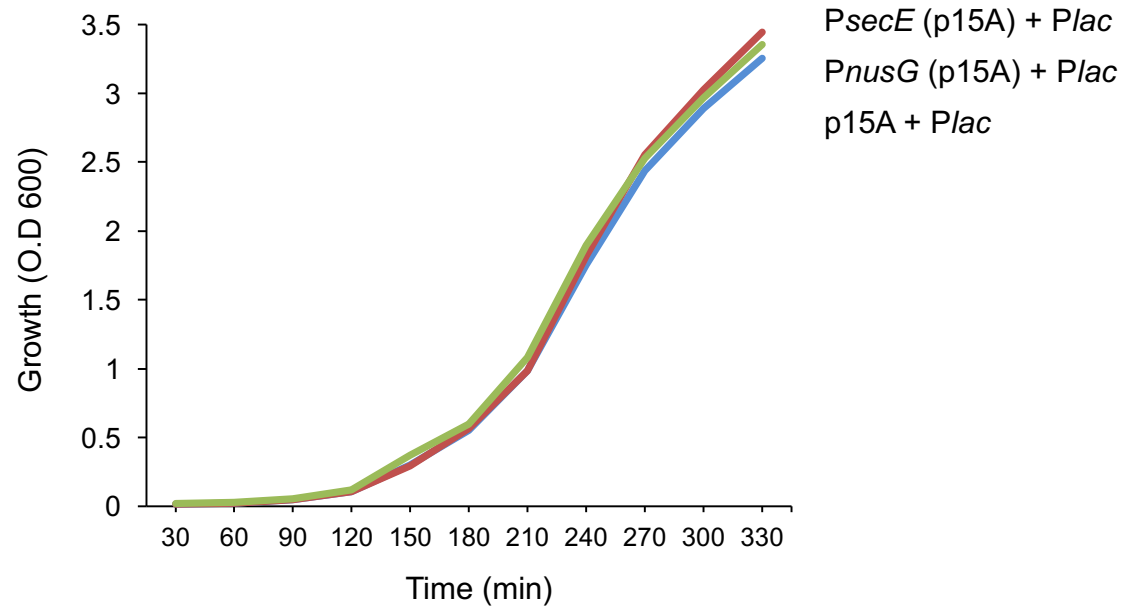

**Appendix Figure S3.** In *trans* expression of NusG (as opposed to SecE) rescues cells from the toxic effects of OxyS. Growth curves of cultures (MG1655 *relA::cat*, *lacI<sup>q</sup>*) carrying control (top) or OxyS plasmids (bottom) were treated with 1mM IPTG at dilution.

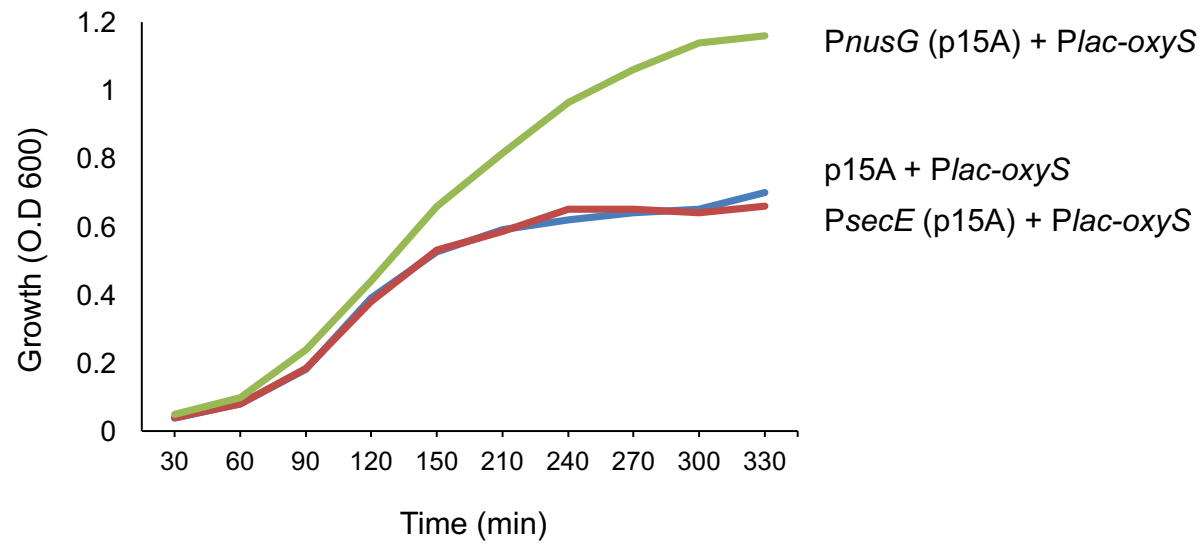



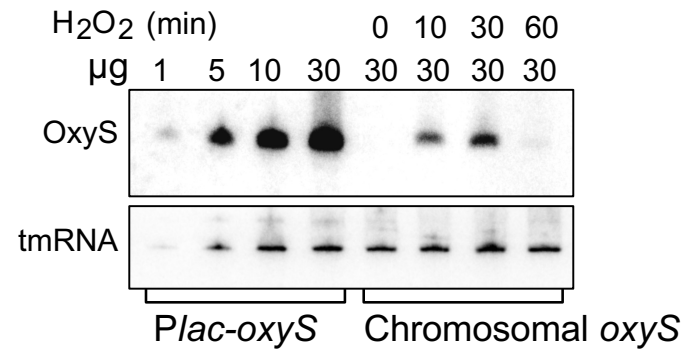

**Appendix Figure S4.** Over night cultures carrying the plasmid *Plac-oxyS* were diluted 1 to 100 in fresh medium supplemented with 1 mM of IPTG to induce expression of OxyS. Total RNA was collected after 90 of growth. Cultures carrying an intact chromosomally encoded *oxyS* allele were treated with 1 mM of hydrogen peroxide at OD600 of 0.1 for the indicated time points. The amounts of total RNA loaded are 1 to 30 μg as indicated. The membrane was probed with *oxyS* and tm specific primers.

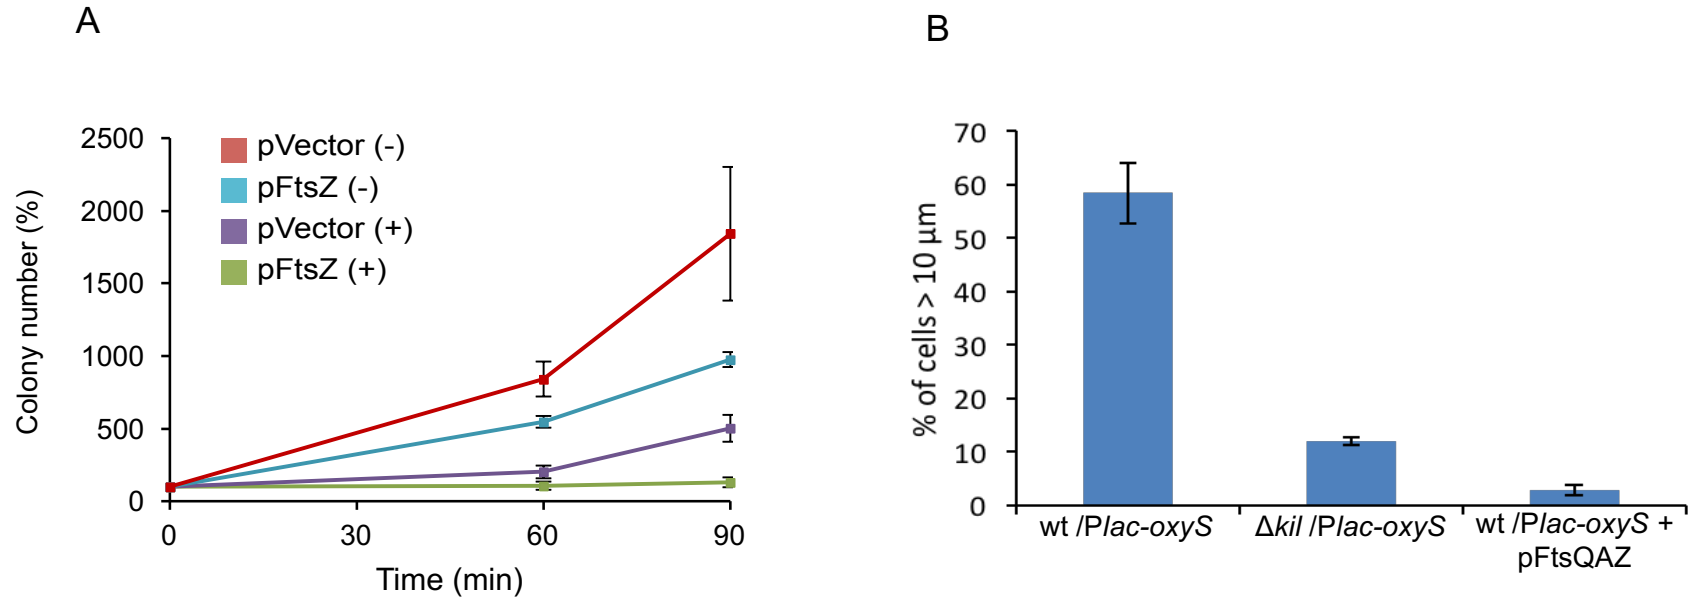

**Appendix Figure S5.** OxyS, KilR and FtsZ effect on recovery and cell length **(A)** OxyS mediated recovery requires impaired FtsZ. Cultures carrying the control plasmid (pVector) and pFtsQAZ (pFtsZ) were grown to OD600 of 0.1 at which half of each culture was exposed to 1mM H<sub>2</sub>O<sub>2</sub> for 30 min (+). Thereafter, the cultures were washed and grown as described in Figure 4. Results are displayed as mean of 4 biological experiments  $\pm$  standard deviation. **(B)**. Cell length distribution of cultures expressing OxyS (*Plac-oxyS*) in wild type and in  $\Delta$ *kilR* mutant or of wild type cultures expressing OxyS and pFtsQAZ (pFtsZ). Results are displayed as mean of 3 biological experiments of each culture  $\pm$  standard deviation. The total number of cells analyzed for *wt/plac-oxyS*,  $\Delta$ *kilR/plac-oxyS* and *wt/plac-oxyS* + pFtsZ were 884, 1010 and 1109, respectively. Statistics (unpaired t-test) was carried out using GraphPad prism software. For all the data the p-value is <0.0001. The cultures were grown as described in Figure 5.

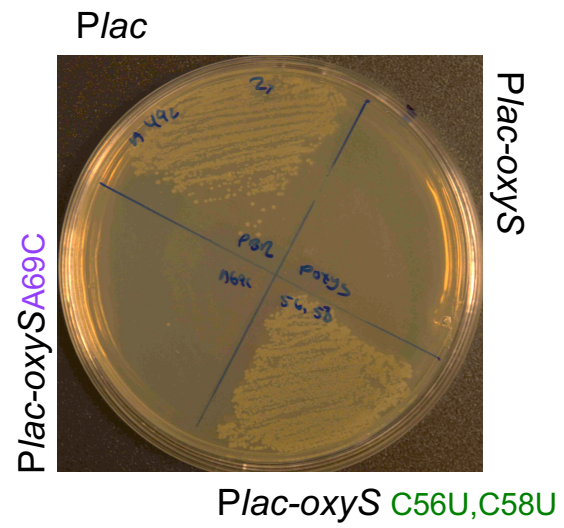

**Appendix Figure S6.** RW434 (*lexA3* SOS-off) were transformed with control and OxyS expressing plasmids. OxyS is still toxic in SOS off cells.

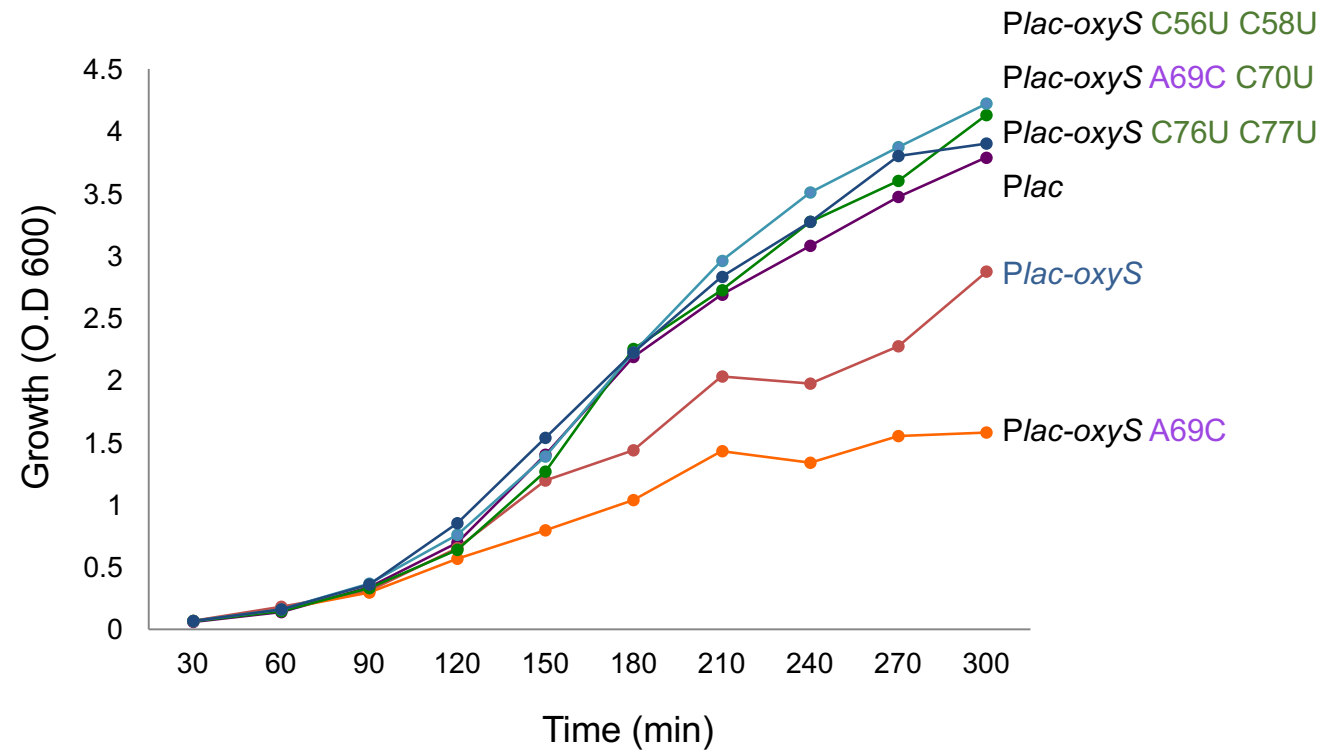

**Appendix Figure S7.** Growth curves of cells carrying a wild type *relA* allele and OxyS plasmids. Cultures carrying plasmids were treated with 1mM IPTG at dilution. O.D was measured as indicated. Suppressor nontoxic mutants (green) highly toxic mutant (purple) (MG1655 *lacI<sup>q</sup>*).

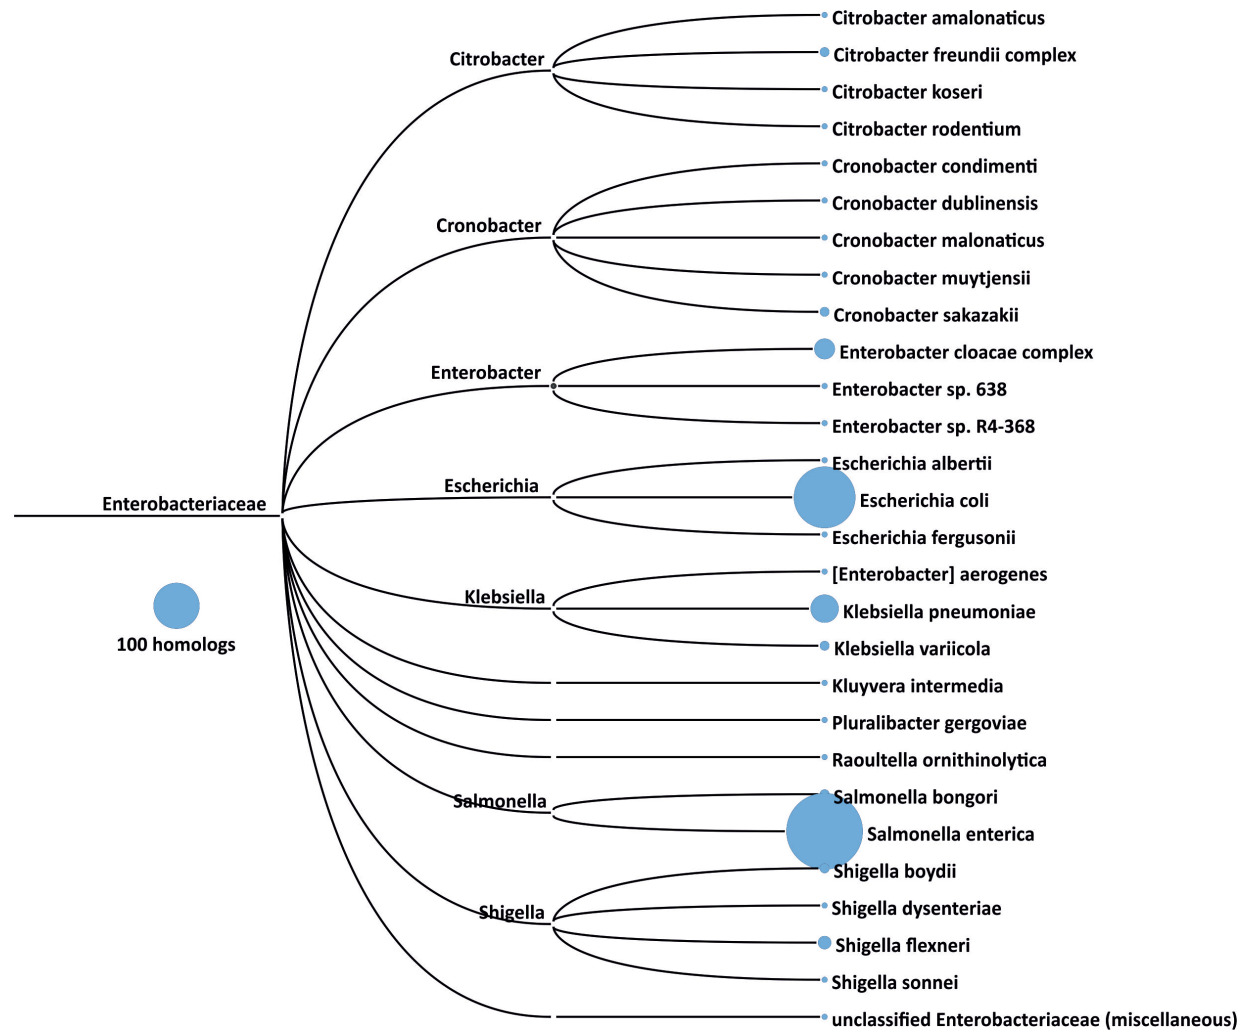

**Appendix Figure S8.** Taxonomic tree of 603 OxyS homologs. OxyS homology search was based on iterative blasting and structural filtering implemented in the GLASSgo webserver (<http://rna.informatik.uni-freiburg.de/GLASSgo/Input.jsp>). The tree was generated with Megan (Huson *et al*, 2016). The area of the blue circles indicates the number of detected homologs per genus.

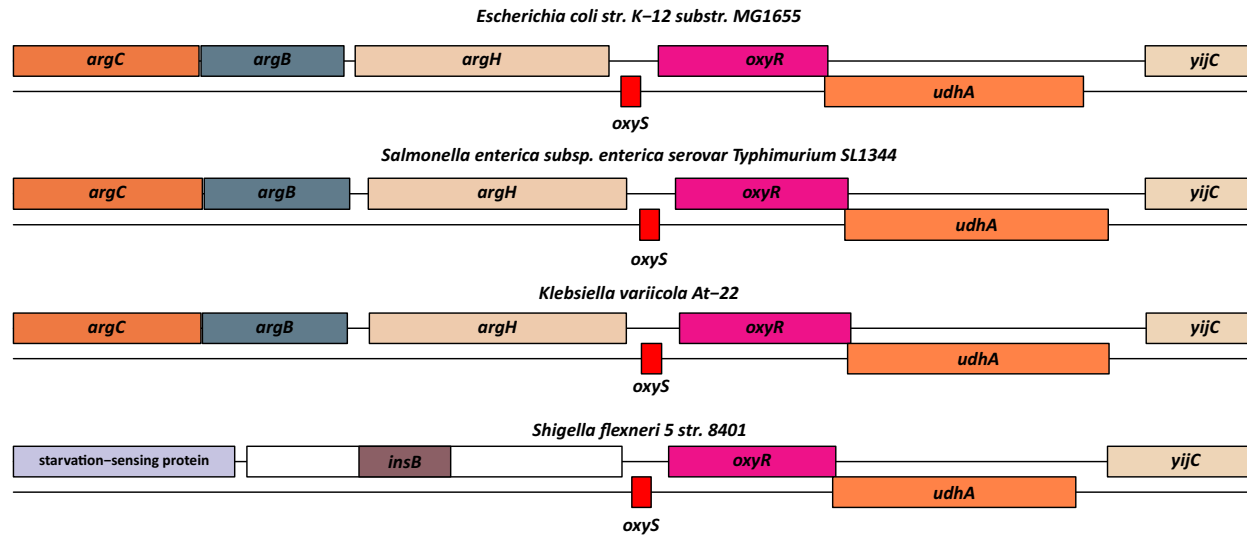

**Appendix Figure S9.** Examples for the conserved synteny around *oxyS*. The loci of OxyS genes in several species are depicted schematically. All homologs are located in the 5' intergenic region of *oxyR* and share a widely conserved synteny.

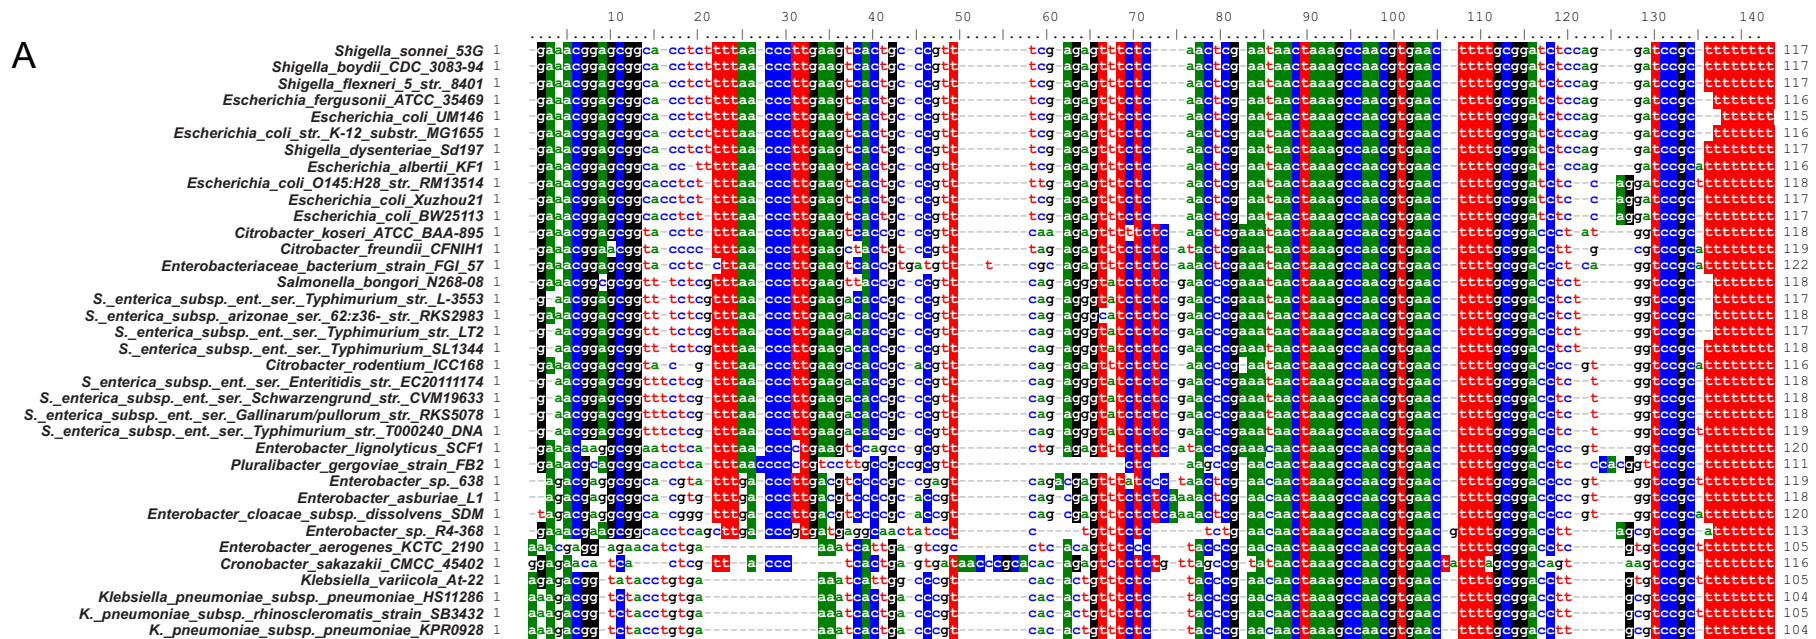

**Appendix Figure S10.** Multiple sequence-structure alignment of 36 OxyS homologs carried out with MAFFT Q-INS-i (Kato & Toh, 2008). **(A)** Bases conserved  $\geq 90\%$  are highlighted. **(B)** OxyS consensus secondary structure generated by RNAalifold (Bernhart *et al*, 2008) based on the alignment in A.

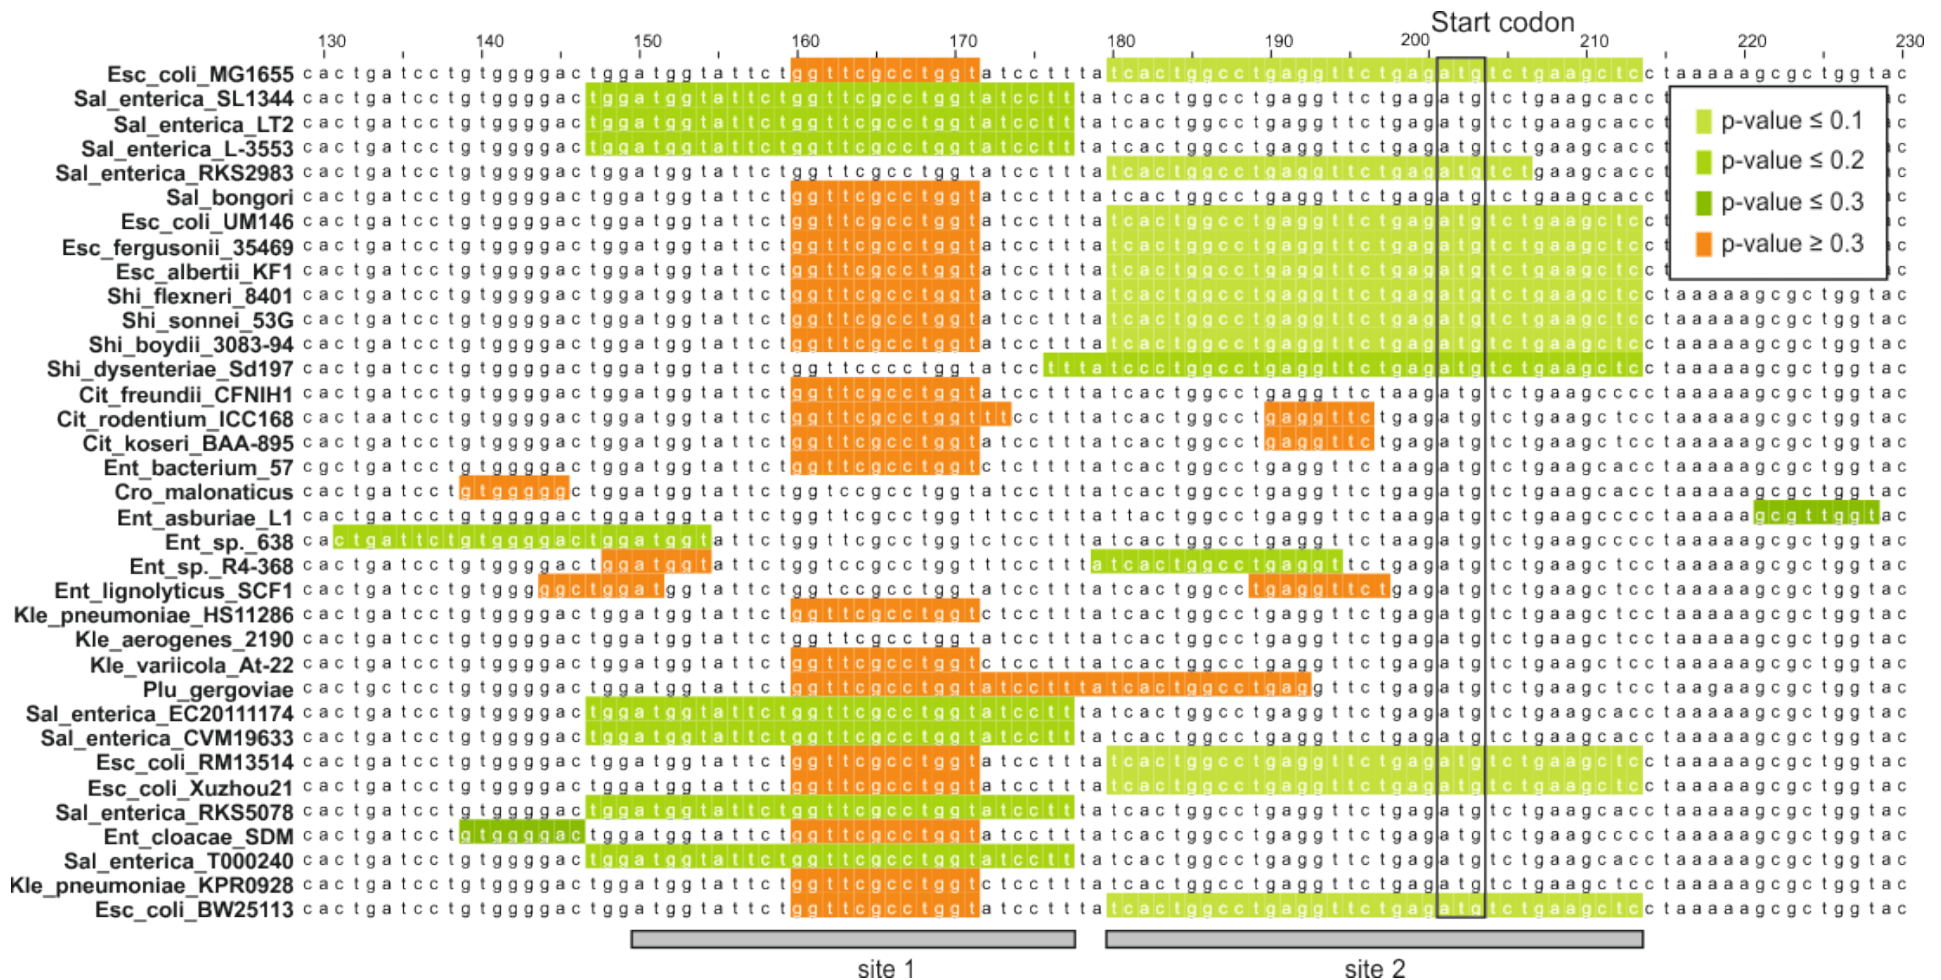

**Appendix Figure S11.** Alignment of the 5'UTRs of the 35 investigated *nusG* homologs. The start codon of NusG is marked by a black box. The interaction regions referring to the optimal and the first suboptimal organism specific predictions from the IntaRNA output with “Turner 1999” energy parameters (Wright *et al.*, 2013) are marked by a colored background. The color indicates the respective prediction p-value with shades of green for a p-value  $\leq 0.3$  and orange for p-values  $> 0.3$ . Two prominent predicted interaction site regions are indicated below the alignment by grey boxes. Site 1 binds upstream of *nusG* ribosome binding site while site 2 overlaps the *nusG* start codon and/or the *nusG* SD region.



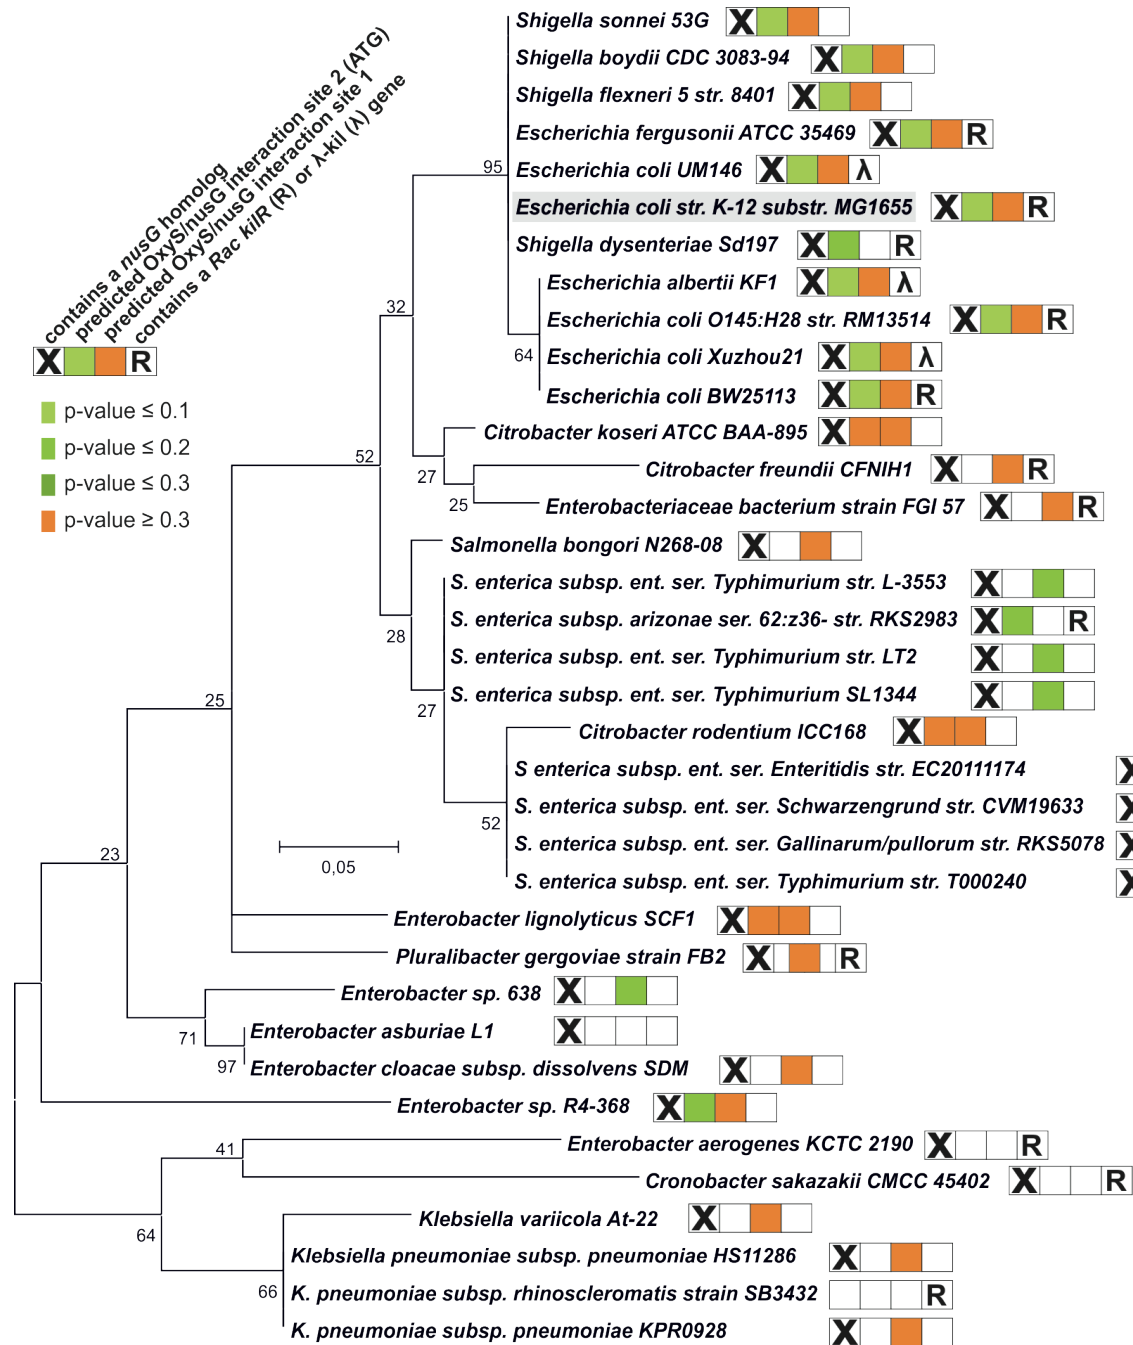

**Appendix Figure S12.** Maximum likelihood tree based on the multiple OxyS alignment above. A “X” in the first square indicates existence of a *nusG* homolog, the second square indicates a predicted OxyS/*nusG* hybrid overlapping the ribosome binding site (site2 regarding to alignment figure), the third square indicates a predicted OxyS/*nusG* hybrid located ~20 nt 5' of *nusG* start codon (site1 regarding to alignment figure). The color in square two and three indicates the respective prediction p-value with shades of green for a p-value  $\leq 0.3$  and orange for p-values  $> 0.3$ , white indicates no prediction at this position. The fourth square indicates the existence of a *kilR* (R) or  $\lambda$ -kil ( $\lambda$ ) homolog . The interaction regions refer to the optimal and the first suboptimal organism specific predictions from the IntaRNA output with “Turner 1999” energy parameters (Wright *et al*, 2013). Conservation of *nusG* and *kilR* was analyzed using blastp with standard parameters (E-value  $\leq 10$ , word size 6, BLOSUM62) against the individual genomes. The evolutionary history was inferred by using the Maximum Likelihood method based on the (Tamura & Nei, 1993). The tree with the highest log likelihood (-557,6917) is shown. The percentage of trees in which the associated taxa clustered together is shown next to the branches. Initial tree(s) for the heuristic search were obtained automatically by applying Neighbor-Joining and BioNJ algorithms to a matrix of pairwise distances estimated using the Maximum Composite Likelihood (MCL) approach, and then selecting the topology with superior log likelihood value. The tree is drawn to scale, with branch lengths measured in the number of substitutions per site. The analysis involved 36 nucleotide sequences. All positions containing gaps and missing data were eliminated. There were a total of 76 positions in the final dataset. Evolutionary analyses were conducted in MEGA7 (Kumar *et al*, 2016).

## Appendix Tables

**Appendix Table S1. Strains**

| Lab stock | Relevant genotype <sup>a</sup>                                                                                           | Source or reference                            |
|-----------|--------------------------------------------------------------------------------------------------------------------------|------------------------------------------------|
| A1        | MG1655 <i>E. coli</i> K-12 F- <i>lambda- ilvG- rfb-50 rph-1</i>                                                          | Lab collection                                 |
| A2        | MC4100 <i>E. coli</i> F- <i>araD139 Δ(argF-lac)U169 rpsL150 relA1 flbB5301 deoC1 ptsF25 rbsR</i>                         | Lab collection                                 |
| A402      | MC4100 <i>relA::cat</i>                                                                                                  | Lab collection                                 |
| A411      | DY378 W3110 <i>λcI857 Δ(cro-bioA)</i>                                                                                    | (Yu <i>et al.</i> , 2000)                      |
| A438      | MC4100 <i>relA::kan</i>                                                                                                  | Lab collection                                 |
| A492      | RW434                                                                                                                    | (Fernandez De Henestrosa <i>et al.</i> , 2000) |
| A708      | MG1655 <i>mal::lacI<sup>q</sup></i>                                                                                      | (Guillier & Gottesman, 2006)                   |
| A782      | (A708) <i>mal::lacI<sup>q</sup> ΔrelA::cat</i> (of A-402)                                                                | This study                                     |
| A807      | MDS42 MG1655 <i>ΔfhuACDB ΔendA</i> and deletion of 699 additional genes, including all IS elements and cryptic prophages | Lab collection                                 |
| A817      | (A708) <i>mal::lacI<sup>q</sup> ΔlacZ::Tn10</i>                                                                          | This study                                     |
| D60       | MC4100 <i>λRS552-fhlA-lacZ</i>                                                                                           | (Altuvia <i>et al.</i> , 1998)                 |
| D999      | (A817) <i>mal::lacI<sup>q</sup> ΔlacZ::Tn10 λRS552-fhlA-lacZ</i> (of D60)                                                | This study                                     |
| A838      | (A708) <i>mal::lacI<sup>q</sup> ΔoxySli::kan</i>                                                                         | This study                                     |
| A840      | (A782) <i>mal::lacI<sup>q</sup> ΔrelA::cat ΔoxySli::kan</i>                                                              | This study                                     |
| A843      | (A838) <i>mal::lacI<sup>q</sup> ΔoxySli::frt</i>                                                                         | This study                                     |
| A850      | (A782) <i>mal::lacI<sup>q</sup> ΔrelA::cat ΔoxySli::frt</i>                                                              | This study                                     |
| A854      | (A807) MDS42 <i>nusG-SPA::kan</i>                                                                                        | This study                                     |

|      |                                                                                           |                              |
|------|-------------------------------------------------------------------------------------------|------------------------------|
| A855 | (A838) <i>mal::lacI<sup>Q</sup> ΔrelA::cat ΔoxySli::frit lacZ::Tn10</i>                   | This study                   |
| A863 | (A782) <i>mal::lacI<sup>Q</sup> ΔrelA::cat nusG-SPA kan</i> (of A-854)                    | This study                   |
| A870 | (A708) <i>mal::lacI<sup>Q</sup> ΔkilR::cat</i>                                            | This study                   |
| A872 | (A708) <i>mal::lacI<sup>Q</sup> ΔrelA::kan</i> (of A-438)                                 | This study                   |
| A873 | (A870) <i>mal::lacI<sup>Q</sup> ΔkilR::cat ΔrelA::kan</i> (of A-438)                      | This study                   |
| A893 | (A843) <i>mal::lacI<sup>Q</sup> ΔrelA::kan</i> (of A-438) <i>ΔoxySli::frit</i>            | This study                   |
| A894 | MG1655 <i>ΔlacIZYA::frit zapA-gfp:cat</i>                                                 | (Peters <i>et al</i> , 2011) |
| A897 | (A872) <i>mal::lacI<sup>Q</sup> ΔrelA::kan zapA-gfp:cat</i> (of A894)                     | This study                   |
| A920 | (A893) <i>mal::lacI<sup>Q</sup> ΔrelA::kan</i> (of A-438) <i>ΔoxySli::frit ΔkilR::cat</i> | This study                   |
| A983 | (A840) <i>mal::lacI<sup>Q</sup> ΔrelA::cat ΔoxySli::kan nusG-SPA kan</i> (of A-854)       | This study                   |

<sup>a</sup>Chromosomal gene mutants and gene fusions were transferred by P1 transduction (see for example of A854)

## Appendix Table S2. Plasmids

| Plasmids              | Genetic elements                      | Origin | Marker           | Source or reference           |
|-----------------------|---------------------------------------|--------|------------------|-------------------------------|
| pKK177-3              | <i>Ptac</i>                           | ColE1  | Amp <sup>r</sup> | (Altuvia <i>et al</i> , 1997) |
| pJL148                |                                       |        | Kan <sup>r</sup> | (Zeghouf <i>et al</i> , 2004) |
| poxyS                 | <i>Ptac-oxyS</i>                      | ColE1  | Amp <sup>r</sup> | (Altuvia <i>et al</i> , 1997) |
| poxyS <sub>A69C</sub> | <i>Ptac-oxyS<sub>A69C</sub></i>       | ColE1  | Amp <sup>r</sup> | Lab collection                |
| pBR-Plac              | <i>PlacO</i>                          | ColE1  | Amp <sup>r</sup> | (Guillier & Gottesman, 2006)  |
| pSA84                 | <i>PlacO-oxyS</i>                     | ColE1  | Amp <sup>r</sup> | This study                    |
| pSA85                 | <i>PlacO-oxyS<sub>A69C</sub></i>      | ColE1  | Amp <sup>r</sup> | This study                    |
| pSA86                 | <i>PlacO-oxyS<sub>AC69,70CU</sub></i> | ColE1  | Amp <sup>r</sup> | This study                    |

|          |                                                       |         |                                  |                                      |
|----------|-------------------------------------------------------|---------|----------------------------------|--------------------------------------|
| pSA87    | <i>PlacO-oxyS</i> C56U,C58U                           | ColE1   | Amp <sup>r</sup>                 | This study                           |
| pSA88    | <i>PlacO-oxyS</i> CC76,77UU                           | ColE1   | Amp <sup>r</sup>                 | This study                           |
| pSA89    | <i>PlacO-oxyS</i> CC76,77GG                           | ColE1   | Amp <sup>r</sup>                 | This study                           |
| pACYC184 |                                                       | p15A    | Cm <sup>r</sup> Tet <sup>r</sup> | Lab collection                       |
| pFtsQAZ  |                                                       | pSC101  | Tet <sup>r</sup>                 | (Bernhardt & de Boer, 2004)          |
| pSA68    | <i>lacZ</i> (translation fusion)                      | pSC101* | Kan <sup>r</sup>                 | (Hershko-Shalev <i>et al</i> , 2016) |
| pSA90    | <i>Ptac-nusG-lacZ</i>                                 | pSC101* | Kan <sup>r</sup>                 | This study                           |
| pSA91    | <i>Ptac-nusG</i> C-15G,C-16G- <i>lacZ</i>             | pSC101* | Kan <sup>r</sup>                 | This study                           |
| pSA92    | <i>Ptac-nusG</i> C-31G,C-32G- <i>lacZ</i>             | pSC101* | Kan <sup>r</sup>                 | This study                           |
| pSA93    | <i>Ptac-nusG</i> C-15G,C-16G,C-31G,C-32G- <i>lacZ</i> | pSC101* | Kan <sup>r</sup>                 | This study                           |
| pSA94    | (B1379) pACYC184 P <sub>secE</sub> <i>secE-nusG</i>   | p15A    | Cm <sup>r</sup>                  | This study                           |
| pSA95    | (B1518) pACYC184 P <sub>secE</sub> <i>secE</i>        | p15A    | Cm <sup>r</sup>                  | This study                           |
| pSA96    | (B1519) pACYC184 P <sub>secE</sub> <i>nusG</i>        | p15A    | Cm <sup>r</sup>                  | This study                           |
| pSA97    | (B1511) <i>PlacO-kilR</i>                             | ColE1   | Amp <sup>r</sup>                 | This study                           |

### Appendix Table S3. Oligonucleotides

#### Oligonucleotides used for cloning

| Primer | Primer sequence (5'-3')       | Use <sup>a</sup>        |
|--------|-------------------------------|-------------------------|
| 2026   | CCCGACGTCGAAACGGAGCGGCACCTC   | <i>oxyS</i> (AatII +)   |
| 2027   | CCCAAGCTTATCGCCGGCTT TTTATGG  | <i>oxyS</i> (HindIII -) |
| 2179   | GGAATTCGCCGTAGTAATTCTGATTGC   | <i>nusG</i> (EcoRI +)   |
| 2181   | TCCCCGGGGGTTGGTACCATGACTTCACC | <i>nusG</i> (SmaI -)    |

|      |                                               |                              |
|------|-----------------------------------------------|------------------------------|
| 2377 | <b>CCCAAGCTT</b> CTGACGTGACTGGTACC            | <i>secE-nusG</i> (HindIII +) |
| 2378 | <b>CGGGATCC</b> GC GCGAAATTGTATTCC            | <i>secE-nusG</i> (BamHI -)   |
| 2700 | <b>CCCGACGTCT</b> TGTAAAAATGGAGATAATTATGATTGC | <i>kilR</i> (AatII +)        |
| 2701 | <b>CCCAAGCTT</b> TGCAAAGGTGGTAAGCAC           | <i>kilR</i> (HindIII -)      |
| 2725 | CTGTGGGGACTGGATGG                             | <i>nusG</i> (+)              |
| 2726 | CGCACTCATAAACCAACC                            | <i>nusG</i> (-)              |
| 2727 | <b>CGGGATCC</b> CTGAACGACGTACCAGC             | <i>secE</i> (BamHI -)        |

<sup>a</sup>Plus (+) and minus (-) strands are indicated. The restriction sites are denoted in bold

### Oligonucleotides used for Real-Time PCR

| Primer | Primer sequence (5'-3')  | Use <sup>a</sup> |
|--------|--------------------------|------------------|
| 1309   | CAGAGATGAGAATGTGCCTTCGGG | <i>rrsB</i> (+)  |
| 1310   | CC CTGGCAACAAAGGATAAGG   | <i>rrsB</i> (-)  |
| 2531   | CCACGTCAGTGTGTGACTC      | <i>kilR</i> (+)  |
| 2532   | CCGCCTTTACAGGTAAACC      | <i>kilR</i> (-)  |

<sup>a</sup>Plus (+) and minus (-) strands are indicated

### Oligonucleotides used for construction of strains

| Primer | Primer sequence (5'-3')                                          | Use <sup>a</sup>                     |
|--------|------------------------------------------------------------------|--------------------------------------|
| 2081   | ATGACCATGATTACGGATTC <u>ACTGGCCGTCGTTACTCGACATCTTGGTTACCG</u>    | $\Delta$ <i>lacZ</i> ( <i>tet</i> +) |
| 2082   | TTATTTTTGACACCAGACCAACTGGTAATGGTAG <u>CAAGAGGGTCATTATATTTTCG</u> | $\Delta$ <i>lacZ</i> ( <i>tet</i> -) |
| 2083   | CCCAGGCTTTACTTTATGC                                              | $\Delta$ <i>lacZ</i>                 |
| 2084   | CATAATGGATTTCCTTACGCG                                            | $\Delta$ <i>lacZ</i>                 |

|      |                                                                   |                               |
|------|-------------------------------------------------------------------|-------------------------------|
| 2169 | CCTCTTTTAACCCTTGAAGTCACTGCCCGTTTCTGTAGGCTGGAGCTGCTTC              | <i>ΔoxySli (kan +)</i>        |
| 2170 | TATGGCAAAAAAAAAAGCGGATCCTGGAGATCCGCATGGGAATTAGCCATGGTCC           | <i>ΔoxySli (kan -)</i>        |
| 2265 | CAGACACCGCATCAACAAAGTTCATTTGTAAAAATGGAGATGGGAATTAGCCATGGTCC       | <i>ΔkilR (cat +)</i>          |
| 2295 | TAAAATCCCGTGCATGAAGTGAAGCATTCTTTCAATAGCTGTAGGCTGGAGCTGCTTC        | <i>ΔkilR (cat -)</i>          |
| 2267 | CTGGTTGCAGTCACCTG                                                 | <i>ΔkilR</i>                  |
| 2296 | TTCATGTGCCATCTGGTC                                                | <i>ΔkilR</i>                  |
| 2216 | GCGACCCCGGTAGAGCTGGACTTCAGCCAGGTTGAAAAAGCCTCCATGGAAAAGAGAAG       | <i>nusG-SPA (+)</i>           |
| 2217 | ACGCCTTGTGCAACGATTAAATCGCCGCTTTTTTGATCGCTGGGTTAGTTCCTATTCCGAAGTTC | <i>nusG-SPA (-)</i>           |
| 2182 | GTGAAGTCATGGTACCAAC                                               | <i>nusG-SPA insertion (+)</i> |
| 2219 | TCCAATCTCACGCCT TG                                                | <i>nusG-SPA insertion (-)</i> |
| 2227 | GGATGAGATTTTCTTAAAGCGG                                            | SPA sequence                  |

<sup>a</sup>Plus (+) and minus (-) strands are indicated. The underlined bases are complementary to the specific cassette used

### **Oligonucleotides used for site-directed mutagenesis**

| <b>Primer</b> | <b>Primer sequence (5'-3')</b> | <b>Use<sup>a</sup></b>                                         |
|---------------|--------------------------------|----------------------------------------------------------------|
| 2039          | CCAACGTGAACTTTTGC              | A <sub>69</sub> C (+), AC <sub>69,70</sub> CU (+)              |
| 2041          | CTTTAGGTATTCGAGTTGAGAAAC       | <i>oxyS</i> A <sub>69</sub> C (-)                              |
| 2040          | CTTTAAGTATTCGAGTTGAGAAAC       | <i>oxyS</i> AC <sub>69,70</sub> CU (-)                         |
| 2079          | GTTTTTTAACTCGAATAACTAAAGCC     | <i>oxyS</i> C <sub>56</sub> U, C <sub>58</sub> U (+)           |
| 2080          | TCTCGAAACGGGCAGTG              | <i>oxyS</i> C <sub>56</sub> U, C <sub>58</sub> U (-)           |
| 2037          | TTAACGTGAACTTTTGC              | <i>oxyS</i> CC <sub>76,77</sub> UU (+)                         |
| 2038          | CTTTAGTTATTCGAGTTGAG           | <i>oxyS</i> CC <sub>76,77</sub> UU, CC <sub>76,77</sub> GG (-) |
| 2408          | GGAACGTGAACTTTTGC              | <i>oxyS</i> CC <sub>76,77</sub> GG (+)                         |

|      |                                            |                                         |
|------|--------------------------------------------|-----------------------------------------|
| 2409 | CCCCTGAGGTTCTGAGATG                        | <i>nusG</i> GG <sub>-15-16</sub> CC (+) |
| 2410 | AGTGATAAAGGATAACCAGGC                      | <i>nusG</i> GG <sub>-15-16</sub> CC (-) |
| 2707 | <b>CCTATCCTTTATCACTCCCCTGAGGTTCTGAGATG</b> | <i>nusG</i> quadruple (+)               |
| 2709 | AGGCGAACCAGAATACCATC                       | <i>nusG</i> quadruple (-)               |
| 2738 | <b>CCTATCCTTTATCACTGGCC</b>                | <i>nusG</i> GG <sub>-31-32</sub> CC (+) |
| 2739 | AGGCGAACCAGAATACC                          | <i>nusG</i> GG <sub>-31-32</sub> CC (-) |

<sup>a</sup>Plus (+) and minus (-) strands are indicated. The mutations are denoted in bold

### Oligonucleotides used for *in vitro* RNA synthesis

| Primer | Primer sequence (5'-3')                                   | fragment <sup>a</sup>            |
|--------|-----------------------------------------------------------|----------------------------------|
| 2220   | <b>CGAAATTAATACGACTCACTATAGGGACAGGGTAATGTC</b> ACTGATCCTG | <b>PT7-</b> <i>nusG</i> (+)      |
| 2221   | GTAATTTGATATGCTCACG                                       | <i>nusG</i> (-)                  |
| 2238   | <b>CGAAATTAATACGACTCACTATAGGGACAGGGAAACGGAGCGGCACC</b>    | <b>PT7-</b> <i>OxyS</i> (+)      |
| 2620   | <b>CGAAATTAATACGACTCACTATAGGGACAGGGTAATTTGATATGCTCACG</b> | <b>PT7-</b> <i>anti nusG</i> (-) |
| 2554   | AGTATTCTGGTTCGCCTG                                        | <i>anti nusG</i> (+)             |

<sup>a</sup>Plus (+) and minus (-) strands are indicated. The nucleotides in bold denote the sequence of the T7 promoter (**PT7**)

### Oligonucleotides used for northern

| Primer | Primer sequence (5'-3') | Use         |
|--------|-------------------------|-------------|
| 492    | GCGGATCCTGGA            | <i>oxyS</i> |
| 1912   | CCGCGTCCGAAATTCCTA      | tmRNA       |

## Appendix references

- Altuvia S, Weinstein-Fischer D, Zhang A, Postow L, Storz G (1997) A small, stable RNA induced by oxidative stress: role as a pleiotropic regulator and antimutator. *Cell* 90: 43-53
- Altuvia S, Zhang A, Argaman L, Tiwari A, Storz G (1998) The *Escherichia coli* OxyS regulatory RNA represses *fhlA* translation by blocking ribosome binding. *Embo J* 17: 6069-75
- Bernhardt TG, de Boer PA (2004) Screening for synthetic lethal mutants in *Escherichia coli* and identification of EnvC (YibP) as a periplasmic septal ring factor with murein hydrolase activity. *Mol Microbiol* 52: 1255-69
- Bernhart SH, Hofacker IL, Will S, Gruber AR, Stadler PF (2008) RNAalifold: improved consensus structure prediction for RNA alignments. *BMC Bioinformatics* 9: 474
- Fernandez De Henestrosa AR, Ogi T, Aoyagi S, Chafin D, Hayes JJ, Ohmori H, Woodgate R (2000) Identification of additional genes belonging to the LexA regulon in *Escherichia coli*. *Mol Microbiol* 35: 1560-72
- Guillier M, Gottesman S (2006) Remodelling of the *Escherichia coli* outer membrane by two small regulatory RNAs. *Mol Microbiol* 59: 231-47
- Hershko-Shalev T, Odenheimer-Bergman A, Elgrably-Weiss M, Ben-Zvi T, Govindarajan S, Seri H, Papenfort K, Vogel J, Altuvia S (2016) Gifsy-1 Prophage IsrK with Dual Function as Small and Messenger RNA Modulates Vital Bacterial Machineries. *PLoS Genet* 12: e1005975
- Huson DH, Beier S, Flade I, Gorska A, El-Hadidi M, Mitra S, Ruscheweyh HJ, Tappu R (2016) MEGAN Community Edition - Interactive Exploration and Analysis of Large-Scale Microbiome Sequencing Data. *PLoS Comput Biol* 12: e1004957
- Katoh K, Toh H (2008) Improved accuracy of multiple ncRNA alignment by incorporating structural information into a MAFFT-based framework. *BMC Bioinformatics* 9: 212
- Kumar S, Stecher G, Tamura K (2016) MEGA7: Molecular Evolutionary Genetics Analysis Version 7.0 for Bigger Datasets. *Mol Biol Evol* 33: 1870-4
- Peters NT, Dinh T, Bernhardt TG (2011) A fail-safe mechanism in the septal ring assembly pathway generated by the sequential recruitment of cell separation amidases and their activators. *J Bacteriol* 193: 4973-83
- Tamura K, Nei M (1993) Estimation of the number of nucleotide substitutions in the control region of mitochondrial DNA in humans and chimpanzees. *Mol Biol Evol* 10: 512-26
- Yu D, Ellis HM, Lee EC, Jenkins NA, Copeland NG, Court DL (2000) An efficient recombination system for chromosome engineering in *Escherichia coli*. *Proc Natl Acad Sci U S A* 97: 5978-83



Wright PR, Richter AS, Papenfort K, Mann M, Vogel J, Hess WR, Backofen R, Georg J (2013) Comparative genomics boosts target prediction for bacterial small RNAs. *Proc Natl Acad Sci U S A* 110: E3487-96

Zeghouf M, Li J, Butland G, Borkowska A, Canadien V, Richards D, Beattie B, Emili A, Greenblatt JF (2004) Sequential Peptide Affinity (SPA) system for the identification of mammalian and bacterial protein complexes. *J Proteome Res* 3: 463-8
